# Supplementary material
Source: PubMed Central journal article supplement (PMC10991978)
Supplement: 262_2021_3029_MOESM1_ESM.pdf [file 262_2021_3029_MOESM1_ESM.pdf]

supplementary Table 1. Objective response rates and disease control rates

| Group     | Mono group (n = 89) | Mono group<br>after PSM (n = 36) | Combo group (n = 37) | Combo group<br>after PSM (n = 36) |
|-----------|---------------------|----------------------------------|----------------------|-----------------------------------|
| CR, n (%) | 2 (2.2)             | 1 (2.8)                          | 0 (0.0)              | 0 (0.0)                           |
| PR, n (%) | 37 (41.6)           | 17 (47.2)                        | 25 (67.6)            | 25 (69.4)                         |
| SD, n (%) | 18 (20.2)           | 5 (13.9)                         | 10 (27.0)            | 9 (25.0)                          |
| PD, n (%) | 23 (25.8)           | 10 (27.8)                        | 2 (5.4)              | 2 (5.6)                           |
| NE, n (%) | 9 (10.1)            | 3 (8.3)                          | 0 (0.0)              | 0 (0.0)                           |
| ORR       | 43.8%               | 50.0%                            | 67.6%                | 69.4%                             |
| DCR       | 64.0%               | 63.9%                            | 94.6%                | 94.4%                             |

CR, complete response; DCR, disease control rate; NE, not evaluable; ORR, objective response rate; PD, progression disease; PR, partial response; PSM, propensity score matching; SD, stable disease.

supplementary Table 2. Subgroup analysis of objective response rates and disease control rates

| Group     | Non-Sq of<br>the Mono group<br>(n = 70) | Sq of<br>the Mono group<br>(n = 19) | Non-Sq of<br>the Combo group<br>(n = 31) | Sq of<br>the Combo group<br>(n = 6) |
|-----------|-----------------------------------------|-------------------------------------|------------------------------------------|-------------------------------------|
| CR, n (%) | 1 (1.4)                                 | 1 (5.2)                             | 0 (0.0)                                  | 0 (0.0)                             |
| PR, n (%) | 30 (42.9)                               | 7 (36.8)                            | 20 (64.5)                                | 5 (83.3)                            |
| SD, n (%) | 14 (20.0)                               | 4 (21.1)                            | 10 (32.3)                                | 1 (16.7)                            |
| PD, n (%) | 18 (25.7)                               | 5 (26.3)                            | 2 (6.5)                                  | 0 (0.0)                             |
| NE, n (%) | 7 (10.0)                                | 2 (10.5)                            | 0 (0.0)                                  | 0 (0.0)                             |
| ORR       | 44.3%                                   | 42.1%                               | 64.5%                                    | 83.3%                               |
| DCR       | 64.3%                                   | 63.2%                               | 96.8%                                    | 100.0%                              |

CR, complete response; DCR, disease control rate; NE, not evaluable; Non Sq, non-squamous cell carcinoma; ORR, objective response rate; PD, progression disease; PR, partial response; PSM, propensity score matching; SD, stable disease; Sq, squamous cell carcinoma.

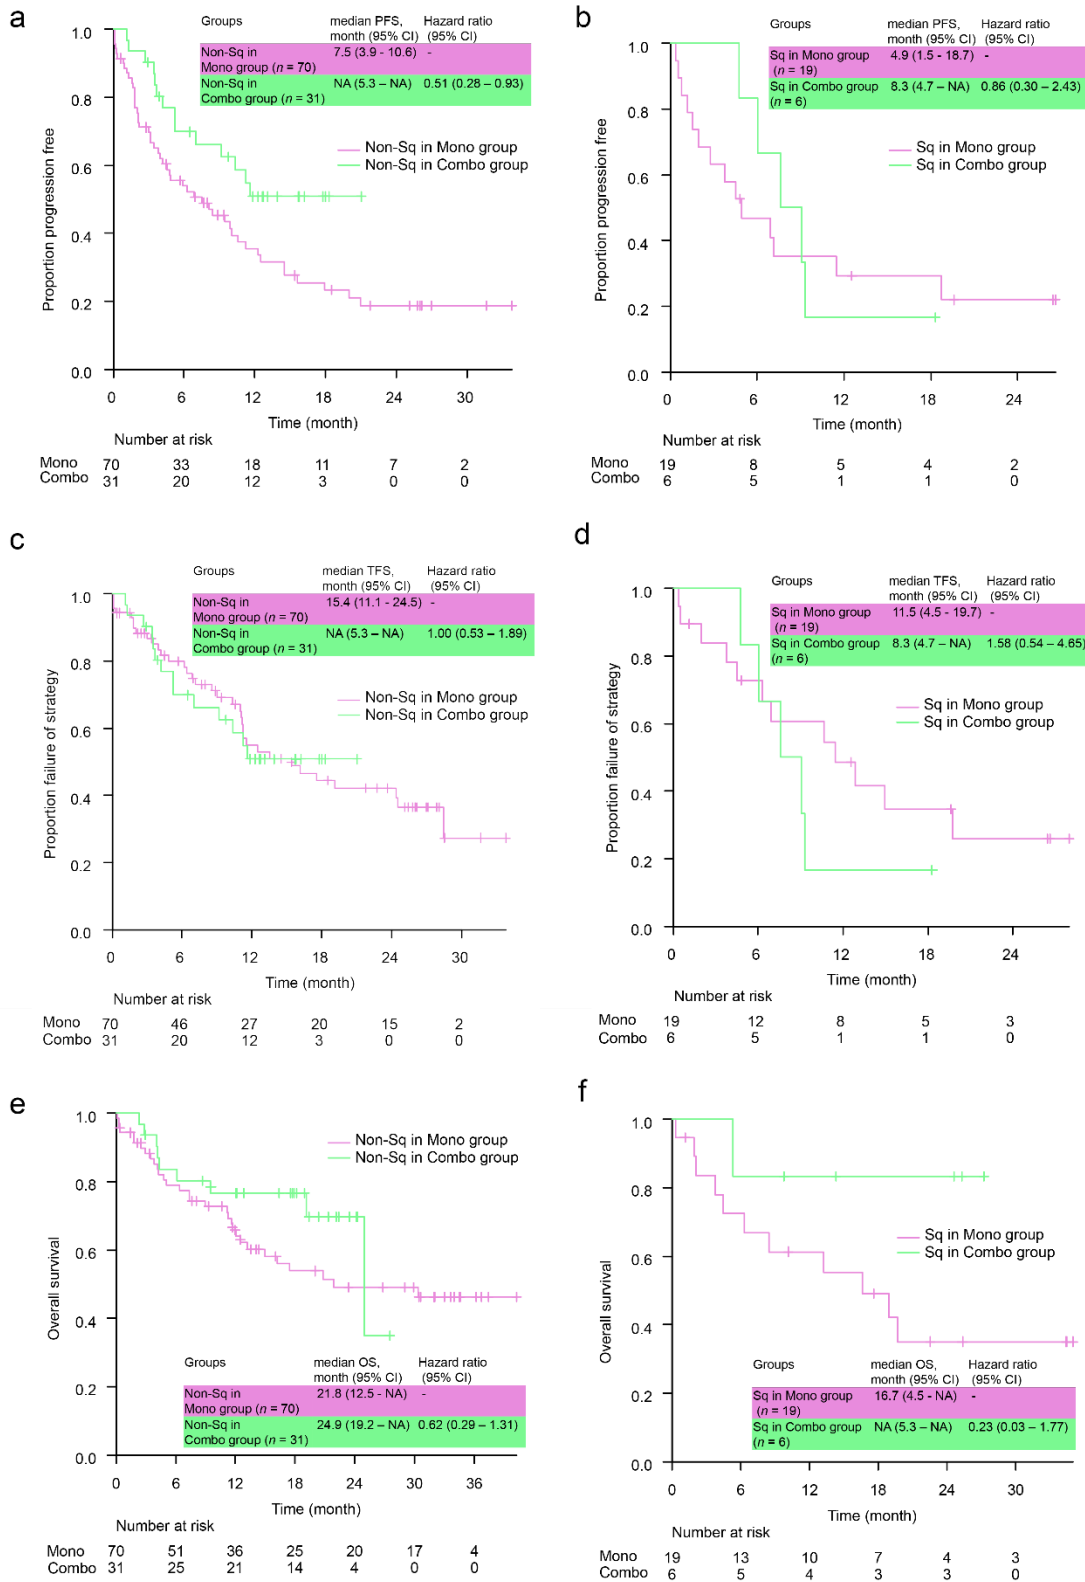

supplementary Fig.1 Subset analysis of survival curve

- a. Progression-free survival of Non-Sq patients
- b. Progression-free survival of Sq patients
- c. Time to failure of strategy of Non-Sq patients
- d. Time to failure of strategy of Sq patients
- e. Overall survival of Non-Sq patients
- f. Overall survival of Sq patients

PFS, TFS, and OS were estimated using the Kaplan-Meier method. The subgroup analysis did not show any significant difference in trend from the overall population.

PFS, progression-free survival; TFS, time to failure of strategy; OS, overall survival; CI, confidence interval; NA, not applicable
